# Supplementary material
Source: ML conference proceedings conference paper supplement (https://proceedings.mlr.press/v130/zhang21f.html)
Supplement: Supplementary file 1 [file zhang21f-supp.zip]

Archive with 4 entries (4 files):
- appendix.pdf
- __MACOSX/._appendix.pdf
- full.pdf
- __MACOSX/._full.pdf
